# Supplementary material for: Linking imaging to omics utilizing image-guided tissue extraction
Source: PubMed Central journal article supplement — Proc Natl Acad Sci U S A. 2018 Mar 5;115(13):E2980–7. doi: 10.1073/pnas.1718304115 (PMC5879681; doi:10.1073/pnas.1718304115), 2018-03-05
Supplement: pnas.201718304SI.pdf [file pnas.201718304SI.pdf]

# Supporting Information

Disselhorst et al. 10.1073/pnas.1718304115

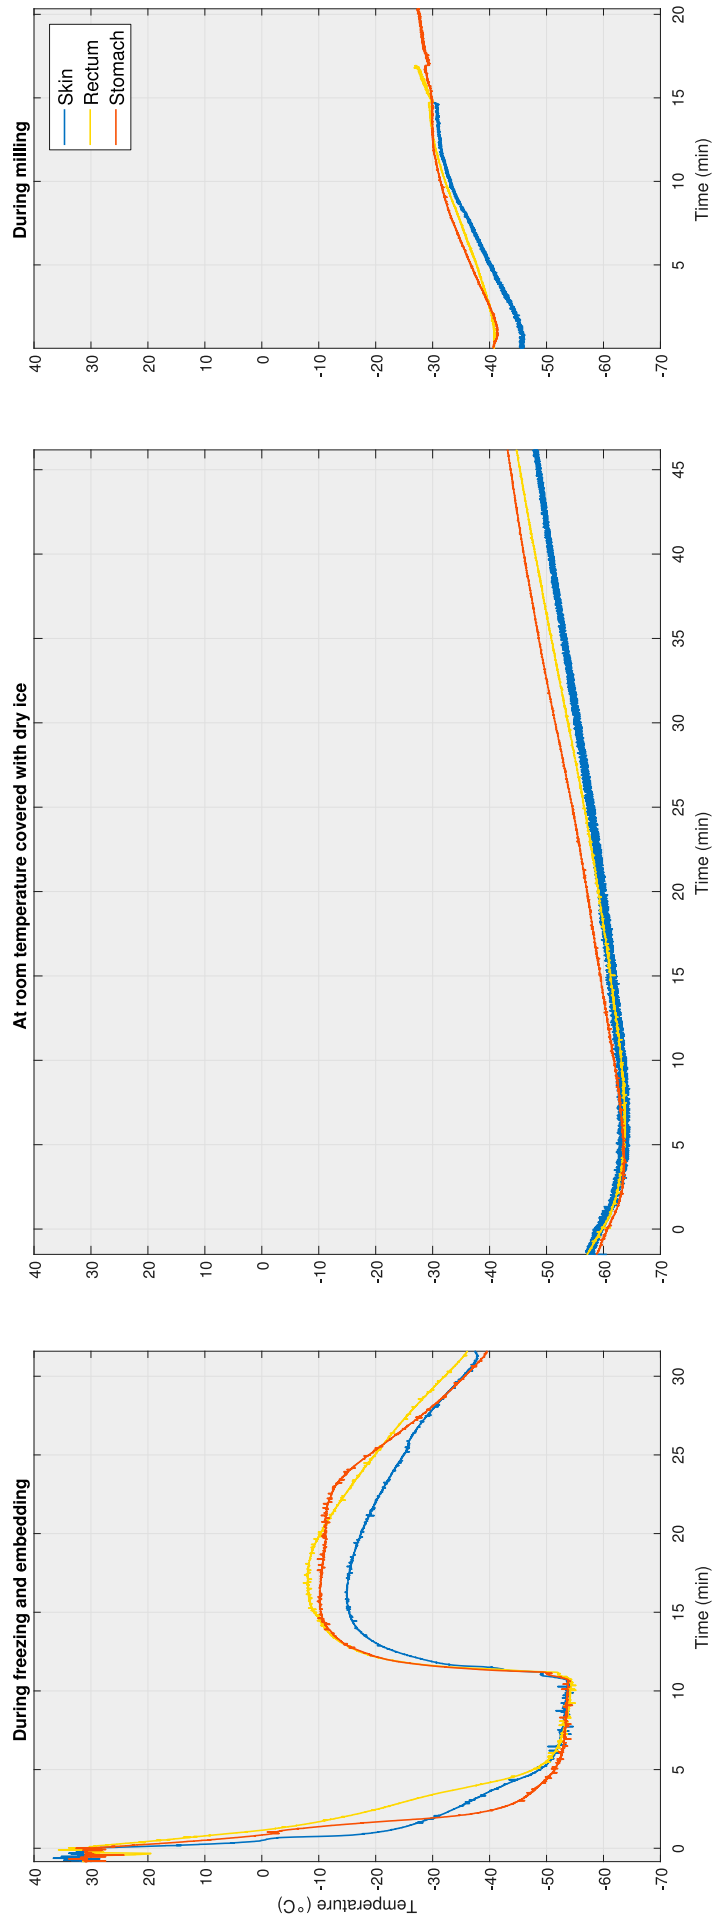

**Fig. S1.** The graphs above show the temperature measured during the entire freezing, preparation, and milling procedure with sensors in the stomach, in the rectum, and embedded under the skin of the mouse. From *Left to Right*, for freezing and embedding, at the time when the mouse is placed at room temperature covered with dry ice to simulate a PET/CT scan, and during milling. In Fig. 2 only 20 min from the middle graph is shown, to illustrate a typical PET/CT scan. In contrast, the graph above shows the full ~45 min where the animal was kept under dry ice at room temperature, as mentioned in the *Materials and Methods*. The temperature was not measured continuously between the three graphs, because the animal had to be moved and the temperature sensors had to be disconnected for this.
